# Supplementary material
Source: PubMed Central journal article supplement (PMC2621323)

## Supplemental Data

### TRAF6 Mediates Smad-Independent Activation

#### of JNK and p38 by TGF- $\beta$

Motozo Yamashita, Karoly Fatyol, Chaoyang Jin, Xiangchun Wang, Zhenggang Liu, and Ying E. Zhang

#### Supplemental Experimental Procedures

##### Plasmids

Expression plasmids for C-terminal Myc-tagged T $\beta$ RII, T $\beta$ RI, kinase deficient T $\beta$ RI (KR), FLAG-tagged constitutively active T $\beta$ RI (TD), N-terminal FLAG-tagged TRAF2, TRAF6, dominant negative TRAF2 (87-501), TRAF6 (289-522), HA-tagged JNK or ubiquitin, and HA-tagged ubiquitin mutants were described previously (Feng et al., 1995; Cao et al., 1996; Hsu et al., 1996; Yu et al., 2002, Vong et al., 2005). C-terminal Myc-tagged T $\beta$ RI (TD), and Smad-binding mutants, T $\beta$ RImL45 and T $\beta$ RImL45 (TD), were constructed by subcloning EcoRI and Sall fragments of coding sequence from C-terminal FLAG-tagged T $\beta$ RI (TD), T $\beta$ RImL45, T $\beta$ RImL45 (TD) (Yu et al., 2002) into the pRK5Myc vector (Feng and Derynck., 1995). C-terminal His6 tagged T $\beta$ RII was constructed by replacing Myc tag with a His6 tag between Sall/HindIII sites of pRK5-T $\beta$ RII-Myc plasmid. FLAG-tagged p38 were generated by PCR of coding sequence of p38 $\alpha$  and inserted into BamHI and Sall sites of N-terminal FLAG-tagged pRK5 vector. PCR-based approaches were also used to generate TRAF6R/Zn (1-288), TRAF6C (358-522), and TRAF6 (C70A).

##### siRNAs

All siRNAs used in the manuscript were synthesized by Qiagen. The target sequence of the Smad3 siRNA is common to both human and mouse gene has been described (Yang et al., 2006). The target sequences for two mouse TRAF6 siRNAs and one human TRAF6 siRNA are: 5'-CAGGCCTTTACAGCTTCTC-3' (Mm\_TRAF6\_1), 5'-GGCCATCACCACGCAGAAC-3' (Mm\_TRAF6\_4), and 5'-CAGCGCTGTGCAAATATATA-3' (Hs\_TRAF6\_4), respectively. The target sequence for the nonsilencing control siRNA (NS) is: 5'-AATTCTCCGAACGTGTCACGT-3'.

## Supplemental References

Cao, Z., Xiong, J., Takeuchi, M., Kurama, T. and Goeddel, D.V. (1996). TRAF6 is a signal transducer for interleukin-1. *Nature* 383, 443-446.

Feng, X.H., Filvaroff, E.H., and Derynck, R. (1995). Transforming growth factor- $\beta$  (TGF- $\beta$ )-induced down-regulation of cyclin A expression requires a functional TGF- $\beta$  receptor complex. *J. Biol. Chem.* 270, 24237-24245.

Hsu, H., Shu, H.B., Pan, M.G. and Goeddel, D.V. (1996). TRADD-TRAF2 and TRADD-FADD interactions define two distinct TNF receptor 1 signal transduction pathways. *Cell* 84, 299-308.

Vong, Q.P., Cao, K., Li, H.Y., Iglesias, P.A. and Zheng, Y. (2005). Chromosome alignment and segregation regulated by ubiquitination of surviving. *Science* 310, 1499-1504.

**Figure S1:** Deletion mapping of the T $\beta$ RII binding domain in TRAF6. HEK293 cells were transfected with expression plasmids for Flag-tagged TRAF6 and Myc-tagged T $\beta$ RII as marked. Cell lysates were subjected to anti-Myc immunoprecipitation followed by anti-Flag immunoblotting. A schematic representation of various deletion constructs of Flag-TRAF6 was shown in Figure 2B.

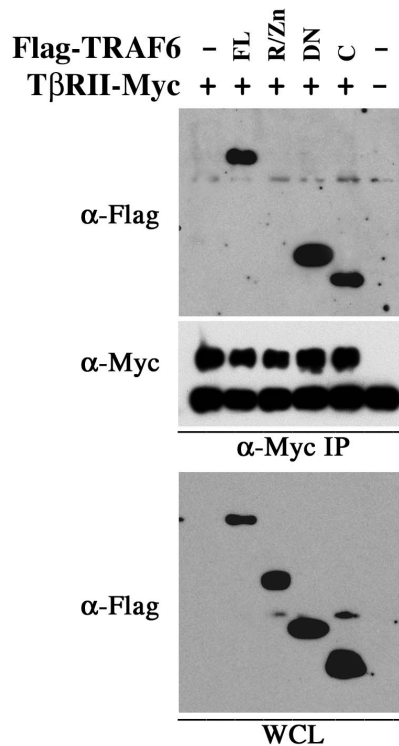

**Figure S2:** Effect of XIAP RNAi on the activation of JNK and p38 by TGF- $\beta$ . AML12 cells were treated with TGF- $\beta$  for 20 min at two days after siRNA transfection. The levels of phospho- or total JNK and p38 in cell lysates were analyzed by western blots.

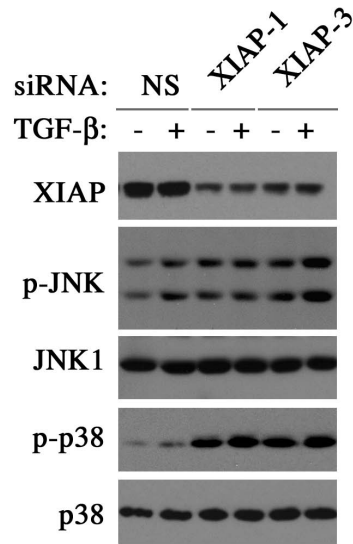

Supplement: NIHMS71755-supplement-01.pdf [file NIHMS71755-supplement-01.pdf]
